# Supplementary material for: Combining risk communication strategies to simultaneously convey the risks of four diseases associated with physical inactivity to socio-demographically diverse populations
Source: Springer Nature journal article supplement (doi:10.1007/s10865-017-9894-3), 2017-10-13

**Supplemental Electronic Material**

Sensitivity analyses

First, we restricted the sample to those who completed the study in 10-45 minutes. These results were overwhelmingly similar to the findings presented in the main analyses section of the paper. Specifically, out of 119 total tests of main effects and interactions with this restricted sample, only 5 tests were different: (1) the significant main effect of social comparison information on message acceptance became nonsignificant, (2) the significant main effect of social comparison information on cognitive absolute perceived risk of any diseases became nonsignificant, and (3) although the two-way interaction between social comparison and numerical format on absolute cognitive perceived risk of colon cancer remained significant, the follow-up simple effect analyses became nonsignificant. Two new main effects were also found: providing risk reduction information increased (4) worry and (5) anticipated regret about getting any diseases. As in the main analyses, all the other 114 tests of main effects and interactions on outcome variables were not statistically significant.

Second, we expanded our sample to include individuals who indicated uncertainty about their risk by answering “don’t know” to items assessing perceived likelihood of disease. Perceived risk uncertainty was created by dichotomizing each perceived likelihood item to indicate whether participants responded “I don’t know” or provided a valid response (e.g., not likely, a little likely, somewhat likely, very likely) (Hay, Orom, Kiviniemi, & Waters, 2015; National Cancer Institute, 2014; Waters, Hay, Orom, Kiviniemi, & Drake, 2013). No significant main effects of the risk communication strategies or interactions among the strategies on any of the risk uncertainty outcomes were found (p’s >.05).

The results of these two sets of sensitivity analyses either did not vary from the main findings or, if they did vary, they varied in ways that did not conflict with what the main findings indicated would be the most advisable combination of risk communication strategies to be incorporated into future interventions (i.e., words only, risk reduction information present, social comparison information absent). Nevertheless, we conducted another set of sensitivity analyses to explore whether using vs. not using this combination of risk communication strategies affected perceived risk uncertainty differently for people of different socio-demographic backgrounds.

Of 32 possible two-way interactions between the selected strategy and socio-demographic variables, only 4 were statistically significant. Two significant interactions were found with graph literacy to affect absolute feelings of risk ~~affective~~ (OR=0.18, p=.00) and comparative ~~affective~~ feelings of risk(OR=0.39, p=.04) ~~perceived risk~~ uncertainty about “any of the diseases shown in the picture”. Follow-up stratified analyses showed that using the selected strategy significantly increased uncertainty for people with lower graph literacy (OR=4.23, p=.01 and OR=3.84, p=.01 for absolute and comparative risk respectively). No significant differences were found among people scoring higher on graph literacy. Further, two significant interactions were found with numeracy to affect uncertainty about absolute feelings of risk ~~affective perceived risk~~ ~~uncertainty~~ (OR=3.74, p=.03) and comparative cognitive perceived risk uncertainty (OR=2.91, p=.04) towards “any of the diseases shown in the picture”. However, the follow-up stratified analyses were not significant and we therefore do not discuss them further.

**References**

Hay, J. L., Orom, H., Kiviniemi, M. T., & Waters, E. A. (2015). “I don’t know” my Cancer Risk: Exploring deficits in cancer knowledge and information-seeking skills to explain an often-overlooked participant response. *Medical Decision Making, 35*, 436-445.

National Cancer Institute. (2014). What does HINTS tell us about... Retrieved January 21, 2014, from https://hints.cancer.gov/questions.aspx

Waters, E. A., Hay, J. L., Orom, H., Kiviniemi, M. T., & Drake, B. F. (2013). “Don’t know” responses to risk perception measures: Implications for underserved populations. *Medical Decision Making, 33*, 271-281.

Risk Ladders

1. No risk reduction information, words only, no social comparison information
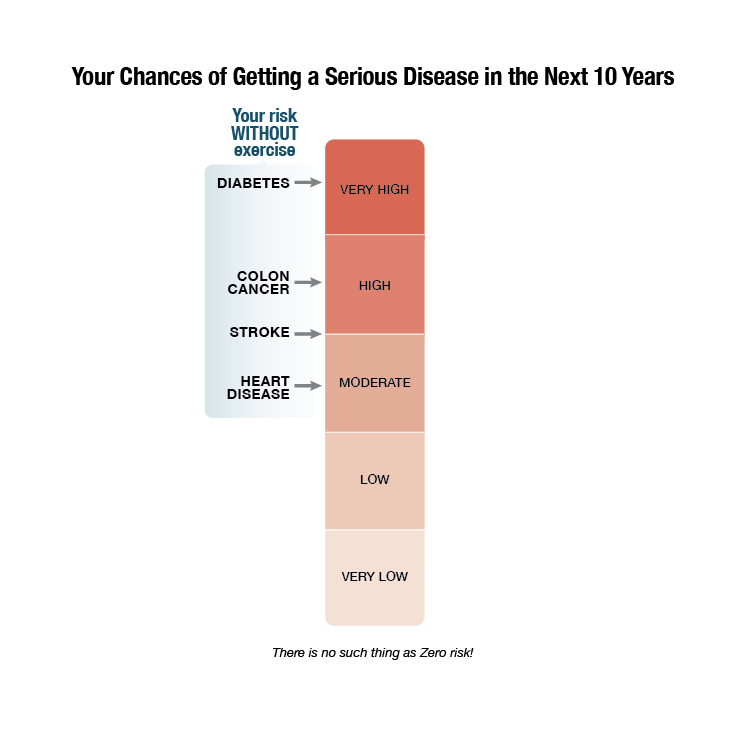


2. Risk reduction information, words only, no social comparison information
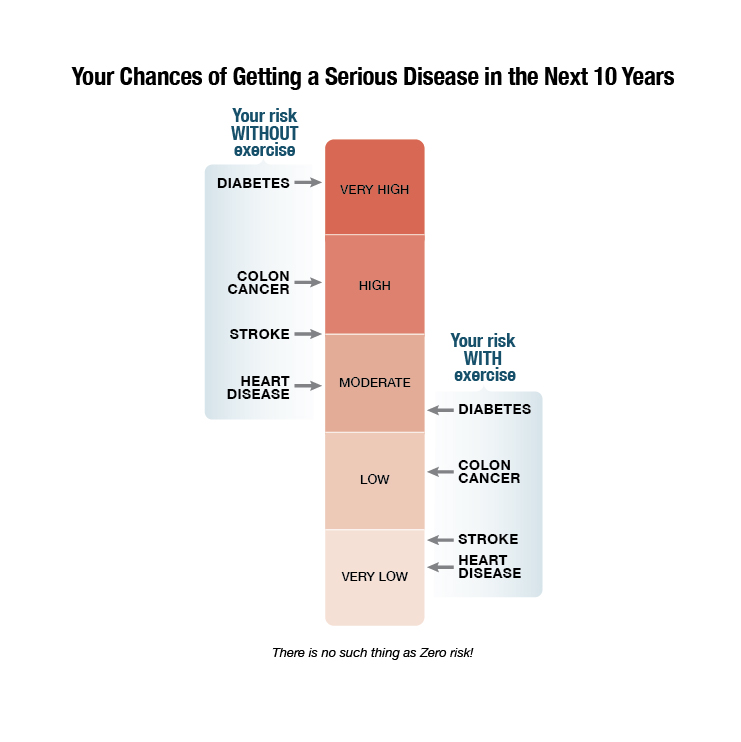


3. No risk reduction information, words only, social comparison information higher than average
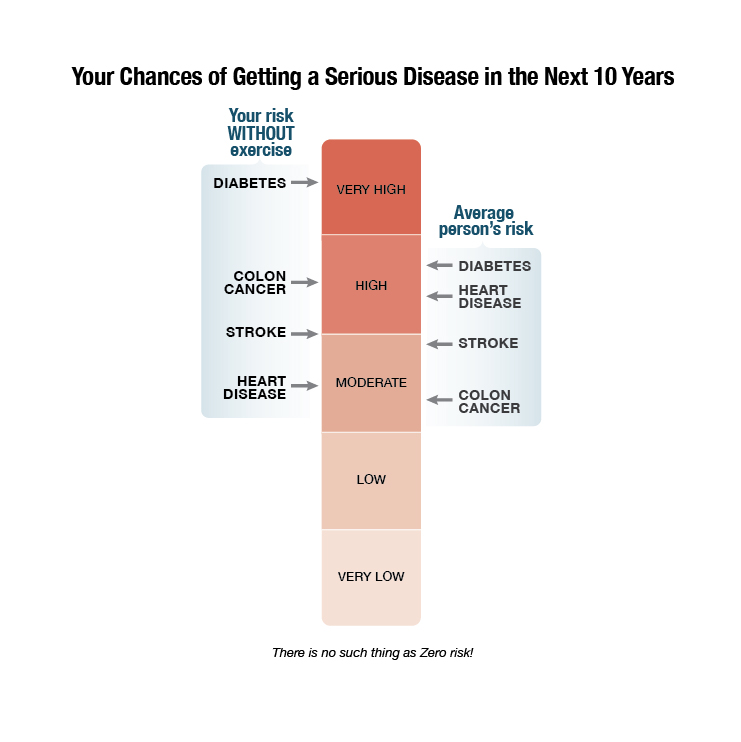


4. No risk reduction information, words only, social comparison information much higher than average
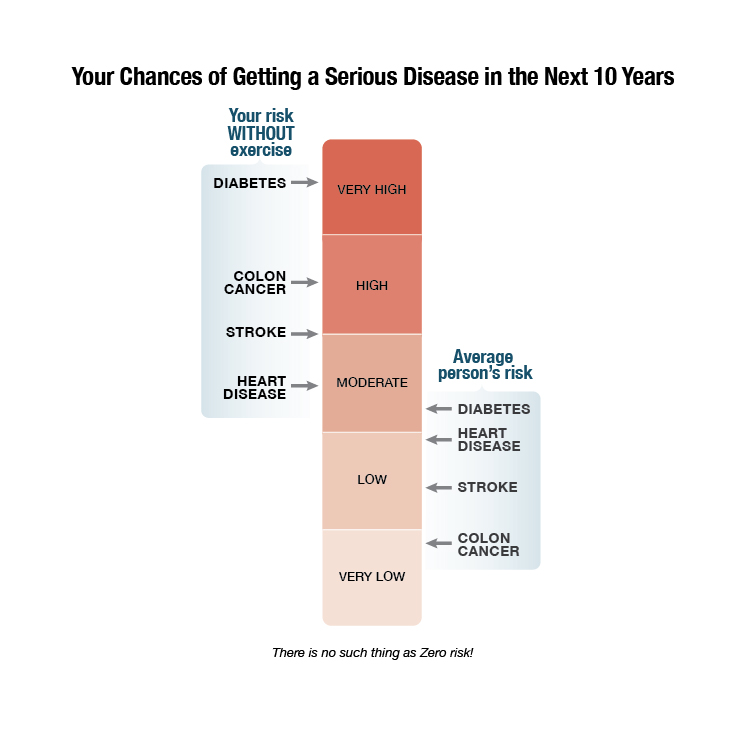


5. Risk reduction information, words only, social comparison information much higher than average
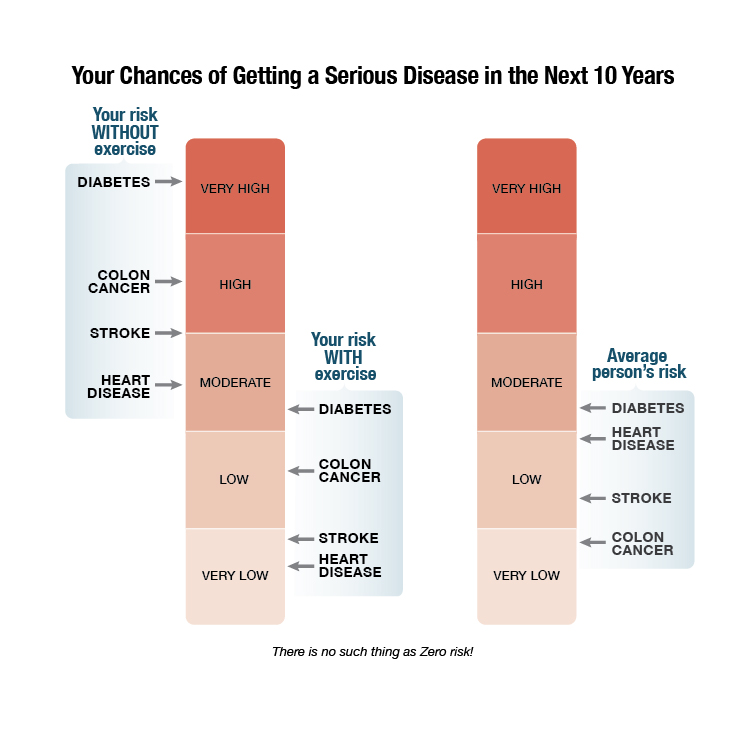


6. Risk reduction information, words only, social comparison information higher than average
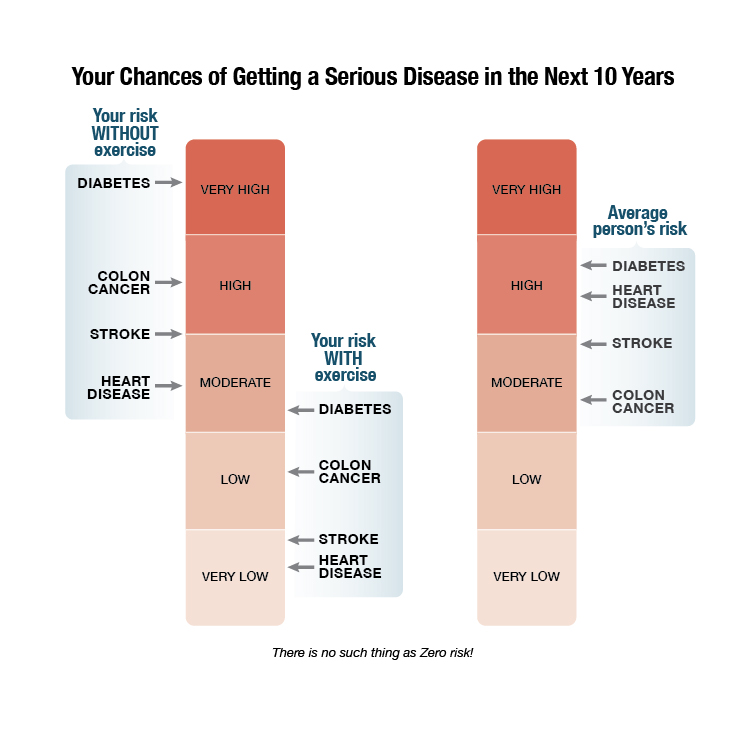


7. No risk reduction information, words plus numbers, no social comparison information
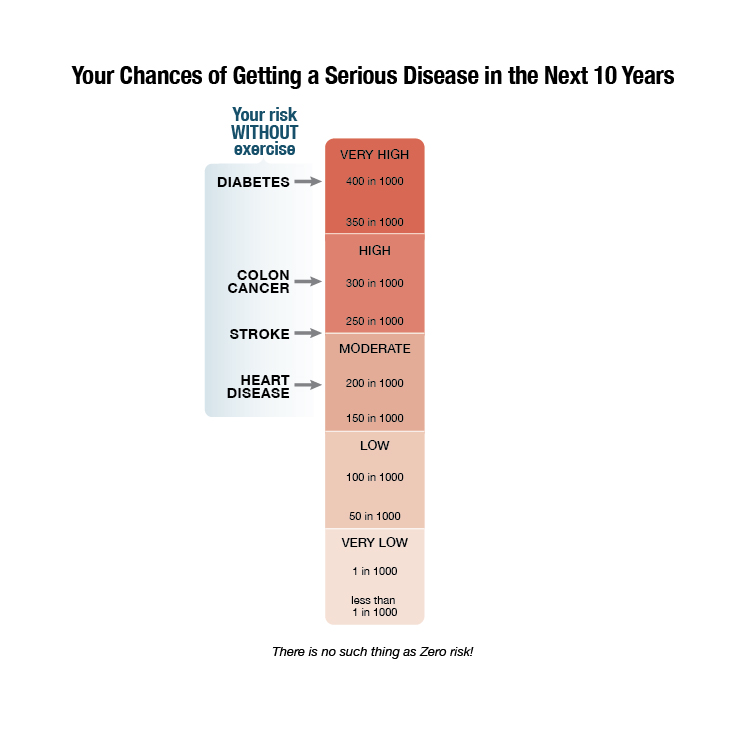


8. Risk reduction information, words plus numbers, no social comparison information
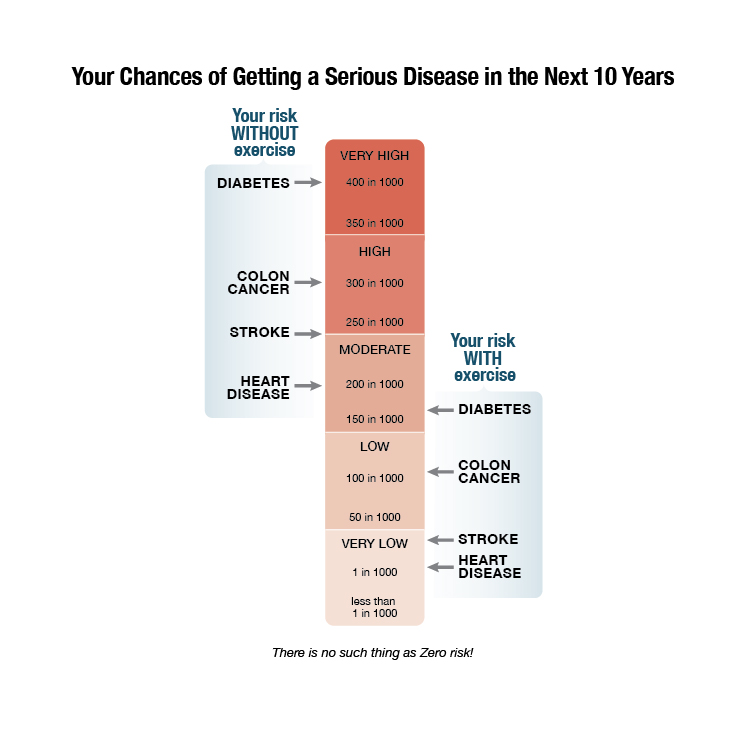


9. No risk reduction information, words plus numbers, social comparison information higher than average
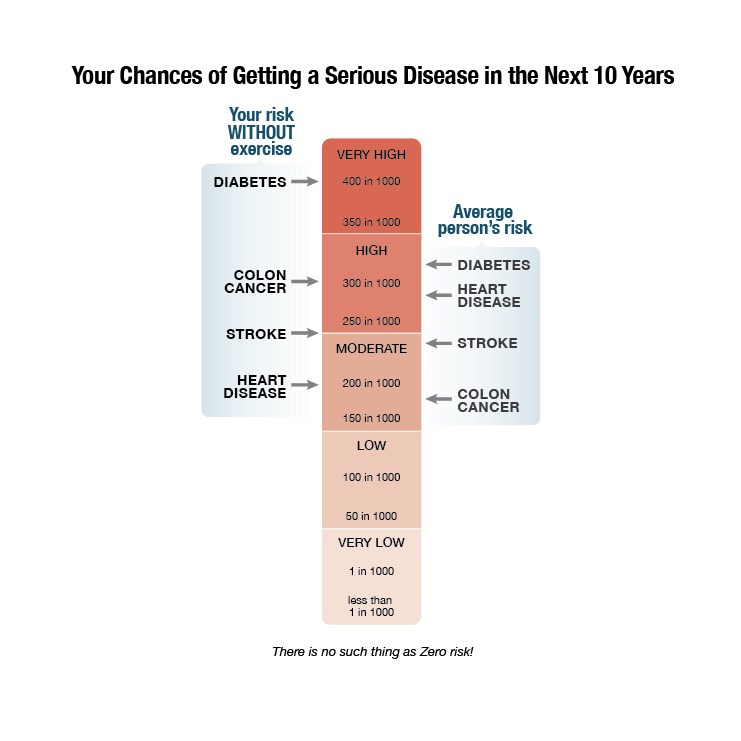


10. Risk reduction information, words plus numbers, social comparison information higher than average
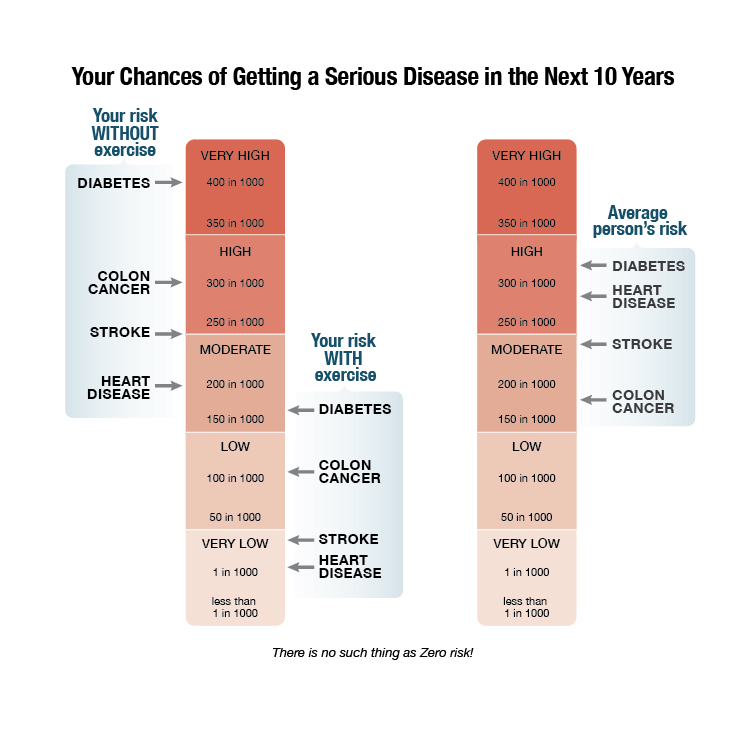


11. No risk reduction information, words plus numbers, social comparison information much higher than average
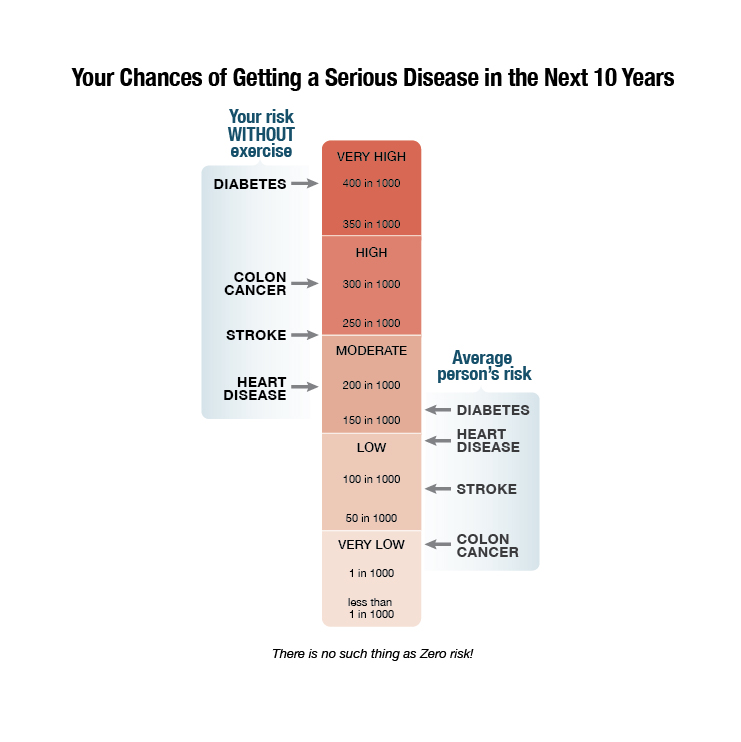


12. Risk reduction information, words plus numbers, social comparison information much higher than average


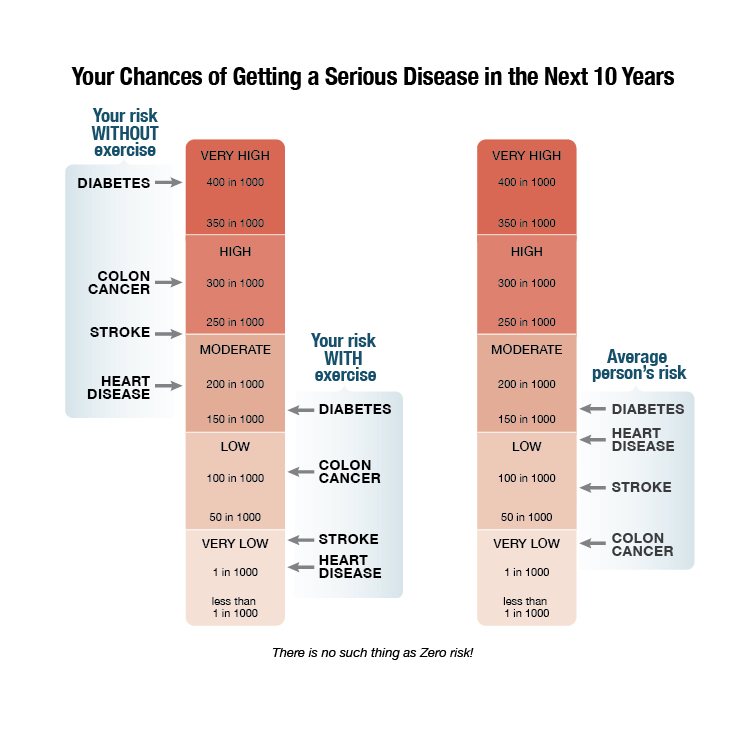

Supplement: MOESM1 [file 15134684]
